# Supplementary material
Source: PubMed Central journal article supplement (PMC3159145)
Supplement: 97320630006240S1.pdf [file 97320630006240S1.pdf]

## Supplementary material:

### Euclidian distances:

$$d = \sqrt{(e_1 - o_1)^2 + (e_2 - o_2)^2}$$

where  $e_1, e_2$  are expected outputs and  $o_1, o_2$  are predicted outputs of two output nodes respectively. For example, maximum possible distance between the predicted and original outputs for the promoter can be considered when the predicted outputs is (1 -1) instead of (-1 1) and vice versa for a non-promoter. Therefore, value of maximum possible distance ( $max_d$ ) between predicted and expected output comes out to be  $2\sqrt{2}$ . Class membership was thus defined as:  $m = 1 - d / max_d$ . Using this distance their actual membership for the class assigned to them was calculated. Mean value obtained for class memberships for both the classes was used as measure of robustness of classification.

**Table 1:** Detailed results of classification on training and validation sets (TP= number of true positives, TN= number of true negatives, FP= number of false positives, FN=number of false negatives)

|                | Size of data | TP  | TN  | FP  | FN  | Sensitivity | Specificity | Accuracy |
|----------------|--------------|-----|-----|-----|-----|-------------|-------------|----------|
| Training Set   | 1797         | 663 | 590 | 310 | 234 | 73.91%      | 65.56%      | 69.73%   |
| Validation Set | 1195         | 424 | 357 | 243 | 171 | 71.26%      | 59.50%      | 65.36%   |
